# Supplementary material for: Assessing the impacts of simulated ocean alkalinity enhancement on viability and growth of nearshore species of phytoplankton
Source: Copernicus journal article supplement (doi:10.5194/bg-22-499-2025), 2025-01-28
Supplement: Supplementary file 1 [file bg-22-499-2025-supplement.pdf]

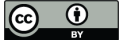

*Supplement of*

## **Assessing the impacts of simulated ocean alkalinity enhancement on viability and growth of nearshore species of phytoplankton**

**Jessica L. Oberlander et al.**

*Correspondence to:* Jessica L. Oberlander ([jessica.oberlander@dal.ca](mailto:jessica.oberlander@dal.ca))

The copyright of individual parts of the supplement might differ from the article licence.

## Supplementary 1

Table S1:

Summary of phytoplankton isolates included in the analysis in Section 2. Medium is the growth medium: B1 (Hansen, 1989) modified with addition of a vitamin solution; f/2 (Guillard, 1975); L1 (Guillard and Hargraves, 1993); MWC (Wright, 1964). L:D is the photoperiod (hours:hours).  $E_{\mu}$  is the growth irradiance ( $\mu\text{mol photons m}^{-2} \text{s}^{-1}$ ). T is the growth temperature ( $^{\circ}\text{C}$ ).

| Division (Class)                        | Species, Strain                         | Isolation Site (Year)     | Medium  | L:D   | $E_{\mu}$ | T        | Source                 |
|-----------------------------------------|-----------------------------------------|---------------------------|---------|-------|-----------|----------|------------------------|
| Chlorophyta                             | <i>Chlamydomonas</i> sp. CCMP 2294      | Baffin Bay, Canada (2003) | L1      | 16:8  | 50        | 3 ± 2    | Søgaard et al. (2011)  |
| Cryptophyta                             | <i>Cryptomonas</i> sp. SAG 26.80        | Unknown (Unknown)         | MWC     | 14:10 | 10-30     | 15 ± 0.2 | Weisse et al. (2006)   |
|                                         | <i>Rhodomonas marina</i> K-0435         | Kattegat, Denmark (1990)  | mod. B1 | 16:8  | 65        | 15 ± 2   | Møgelhøj et al. (2006) |
|                                         | <i>Rhodomonas marina</i> K-0435         | Kattegat, Denmark (1990)  | f/2     | 14:10 | 150       | 15       | Berge et al. (2010)    |
|                                         | <i>Rhodomonas salina</i> K-0294         | Øresund, Denmark (1989)   | mod. B1 | 16:8  | 65        | 15 ± 2   | Møgelhøj et al. (2006) |
|                                         | <i>Teleaulax amphioxeia</i>             | Øresund, Denmark (2009)   | f/2     | 14:10 | 150       | 15       | Berge et al. (2010)    |
| Heterokontophyta<br>(Bacillariophyceae) | <i>Coscinodiscus granii</i> K-1048      | USA (1994)                | f/2     | 14:10 | 150       | 15       | Berge et al. (2010)    |
|                                         | <i>Fragilariopsis nana</i> SCCAP K-0637 | Labrador Sea (Unknown)    | L1      | 16:8  | 50        | 3 ± 2    | Søgaard et al. (2011)  |
|                                         | <i>Fragilariopsis</i> sp. CCMP 2297     | Baffin Bay (1998)         | L1      | 16:8  | 50        | 3 ± 2    | Søgaard et al. (2011)  |

| Division (Class)                        | Species, Strain                                   | Isolation Site (Year)                             | Medium       | L:D  | $E_{\mu}$          | T          | Source                    |
|-----------------------------------------|---------------------------------------------------|---------------------------------------------------|--------------|------|--------------------|------------|---------------------------|
| Heterokontophyta<br>(Bacillariophyceae) | <i>Nitzschia navis-varingica</i> VHL985           | Unknown                                           | f/2 w/ 3x Si | 16:8 | 20, 35,<br>80, 250 | 16.5 ± 0.5 | Nielsen et al.<br>(2007)  |
|                                         | <i>Nitzschia navis-varingica</i> VHL987           | Baiona, Ría Vigo, Spain<br>(2001)                 | L1           | 16:8 | 100                | 15 ± 1     | Lundholm et al.<br>(2004) |
|                                         | <i>Phaeodactylum tricorutum</i>                   | Unknown                                           | mod. B1      | 16:8 | 65                 | 15 ± 2     | Møgelhøj et al.<br>(2006) |
|                                         | <i>Pseudo-nitzschia australis</i> PS11V           | Baiona, Ría Vigo, Spain<br>(2001)                 | L1           | 16:8 | 100                | 15 ± 1     | Lundholm et al.<br>(2004) |
|                                         | <i>Pseudo-nitzschia calliantha</i> CL-190         | Baie-Sainte-Anne, New<br>Brunswick, Canada (2002) | L1           | 16:8 | 100                | 15 ± 1     | Lundholm et al.<br>(2004) |
|                                         | <i>Pseudo-nitzschia cf. turgidula</i> PT          | Ocean Station Papa, NE<br>Pacific (2002)          | L1           | 16:8 | 100                | 15 ± 1     | Lundholm et al.<br>(2004) |
|                                         | <i>Pseudo-nitzschia delicatissima</i><br>Tasm10   | Hobart Harbour, Tasmania<br>(2000)                | L1           | 16:8 | 100                | 15 ± 1     | Lundholm et al.<br>(2004) |
|                                         | <i>Pseudo-nitzschia fraudulenta</i> CL-192        | Deadmans Harbour, Bay of<br>Fundy, Canada (2002)  | L1           | 16:8 | 100                | 15 ± 1     | Lundholm et al.<br>(2004) |
|                                         | <i>Pseudo-nitzschia granii</i> PG                 | Ocean Station Papa, NE<br>Pacific (2000)          | L1           | 16:8 | 100                | 15 ± 1     | Lundholm et al.<br>(2004) |
|                                         | <i>Pseudo-nitzschia multiseriata</i> CL-195       | Okkiray Bay, Iwate<br>Prefecture, Japan (2001)    | L1           | 16:8 | 100                | 15 ± 1     | Lundholm et al.<br>(2004) |
|                                         | <i>Pseudo-nitzschia multiseriata</i><br>OKPm013-2 | Ha Long Bay, Vietnam<br>(1998)                    | L1           | 16:8 | 100                | 15 ± 1     | Lundholm et al.<br>(2004) |
|                                         | <i>Pseudo-nitzschia pungens</i> CL-193            | Deadmans Harbour, Bay of<br>Fundy, Canada (2002)  | L1           | 16:8 | 100                | 15 ± 1     | Lundholm et al.<br>(2004) |
|                                         | <i>Pseudo-nitzschia seriata</i> CL-150            | Tracadie Harbour, PEI,<br>Canada (2002)           | L1           | 16:8 | 100                | 15 ± 1     | Lundholm et al.<br>(2004) |

| Division (Class)                        | Species, Strain                          | Isolation Site (Year)                 | Medium       | L:D   | $E_{\mu}$          | T          | Source                                    |
|-----------------------------------------|------------------------------------------|---------------------------------------|--------------|-------|--------------------|------------|-------------------------------------------|
| Heterokontophyta<br>(Bacillariophyceae) | <i>Pseudo-nitzschia</i> sp. NWFSC095     | Sequim Bay, Washington,<br>USA (2002) | L1           | 16:8  | 100                | 15 ± 1     | Lundholm et al.<br>(2004)                 |
| Heterokontophyta<br>(Raphidophyceae)    | <i>Chattonella marina</i> NIES-3         | Osaka Bay, Japan (1982)               | K            | 12:12 | c. 42              | 22-24      | Liu et al. (2007)                         |
| Haptophyta                              | <i>Chrysochromulina polylepis</i> K-0259 | Øresund, Denmark (1988)               | f/2          | 16:8  | 60                 | 15 ± 1     | Schmidt & Hansen<br>(2001)                |
|                                         | <i>Chrysochromulina simplex</i> K-0272   | Victoria, Australia (1988)            | f/2          | 16:8  | 60                 | 15 ± 1     | Schmidt & Hansen<br>(2001)                |
|                                         | <i>Prymnesium parvum</i> K-0623          | Unknown                               | f/2          | 14:10 | 150                | 15         | Berge et al.<br>(2010)                    |
| Dinoflagellata                          | <i>Ceratium furca</i>                    | Øresund, Denmark (2003)               | f/2          | 16:8  | 25, 100,<br>200    | 15 ± 1     | Søderberg et al.<br>(2007)                |
|                                         | <i>Ceratium fusus</i>                    | Øresund, Denmark (2003)               | f/2          | 16:8  | 100                | 15 ± 1     | Søderberg et al.<br>(2007)                |
|                                         | <i>Ceratium lineatum</i>                 | Øresund, Denmark (1995)               | f/2          | 16:8  | 60                 | 15 ± 1     | Hansen (2002);<br>Hansen et al.<br>(2007) |
|                                         | <i>Ceratium tripos</i>                   | Øresund, Denmark (2003)               | f/2          | 16:8  | 100                | 15 ± 1     | Søderberg & Hansen<br>(2007)              |
|                                         | <i>Heterocapsa triquetra</i>             | Unknown                               | f/2 w/ 3x Si | 16:8  | 20, 35,<br>80, 250 | 16.5 ± 0.5 | Nielsen et al.<br>(2007)                  |
|                                         | <i>Heterocapsa triquetra</i> 2-1, K-1127 | Stege Harbour, Denmark<br>(2007)      | L1           | 16:8  | 150                | 15         | Berge et al.<br>(2012)                    |
|                                         | <i>Heterocapsa triquetra</i> 2-3         | Stege Harbour, Denmark<br>(2007)      | L1           | 16:8  | 150                | 15         | Berge et al.<br>(2012)                    |
|                                         | <i>Heterocapsa triquetra</i> 2-5         | Stege Harbour, Denmark<br>(2007)      | L1           | 16:8  | 150                | 15         | Berge et al.<br>(2012)                    |

| Division (Class) | Species, Strain                          | Isolation Site (Year)              | Medium | L:D  | $E_{\mu}$ | T      | Source                  |
|------------------|------------------------------------------|------------------------------------|--------|------|-----------|--------|-------------------------|
| Dinoflagellata   | <i>Heterocapsa triquetra</i> 2-6         | Stege Harbour, Denmark<br>(2007)   | L1     | 16:8 | 150       | 15     | Berge et al.<br>(2012)  |
|                  | <i>Heterocapsa triquetra</i> A2b, K-1131 | Copenhagen, Denmark<br>(2007)      | L1     | 16:8 | 150       | 15     | Berge et al.<br>(2012)  |
|                  | <i>Heterocapsa triquetra</i> A4a         | Copenhagen, Denmark<br>(2007)      | L1     | 16:8 | 150       | 15     | Berge et al.<br>(2012)  |
|                  | <i>Heterocapsa triquetra</i> A4c         | Copenhagen, Denmark<br>(2007)      | L1     | 16:8 | 150       | 15     | Berge et al.<br>(2012)  |
|                  | <i>Heterocapsa triquetra</i> A5c, K-1134 | Copenhagen, Denmark<br>(2007)      | L1     | 16:8 | 150       | 15     | Berge et al.<br>(2012)  |
|                  | <i>Heterocapsa triquetra</i> CCMP 449    | Lawrence Estuary, Canada<br>(1960) | L1     | 16:8 | 150       | 15     | Berge et al.<br>(2012)  |
|                  | <i>Heterocapsa triquetra</i> F1a, K-1124 | Gedser Harbour, Denmark<br>(2007)  | L1     | 16:8 | 150       | 15     | Berge et al.<br>(2012)  |
|                  | <i>Heterocapsa triquetra</i> F1c, K-1125 | Gedser Harbour, Denmark<br>(2007)  | L1     | 16:8 | 150       | 15     | Berge et al.<br>(2012)  |
|                  | <i>Heterocapsa triquetra</i> F1f         | Gedser Harbour, Denmark<br>(2007)  | L1     | 16:8 | 150       | 15     | Berge et al.<br>(2012)  |
|                  | <i>Heterocapsa triquetra</i> F2e         | Gedser Harbour, Denmark<br>(2007)  | L1     | 16:8 | 150       | 15     | Berge et al.<br>(2012)  |
|                  | <i>Heterocapsa triquetra</i> HTMS0402    | Masan Bay Korea (2004)             | L1     | 16:8 | 150       | 15     | Berge et al.<br>(2012)  |
|                  | <i>Heterocapsa triquetra</i> K-0447      | The Sound, Denmark (1984)          | L1     | 16:8 | 150       | 15     | Berge et al.<br>(2012)  |
|                  | <i>Heterocapsa triquetra</i> K-0481      | Øresund, Denmark (1988)            | f/2    | 16:8 | 60        | 15 ± 1 | Hansen (2002)           |
|                  | <i>Heterocapsa triquetra</i> K-0481      | Øresund, Denmark (1988)            | f/2    | 16:8 | 60        | 15 ± 1 | Hansen et al.<br>(2007) |

| Division (Class) | Species, Strain                       | Isolation Site (Year)         | Medium  | L:D   | $E_{\mu}$ | T      | Source                 |
|------------------|---------------------------------------|-------------------------------|---------|-------|-----------|--------|------------------------|
| Dinoflagellata   | <i>Heterocapsa triquetra</i> K-0481   | Øresund, Denmark (1988)       | mod. B1 | 16:8  | 65        | 15 ± 2 | Møgelhøj et al. (2006) |
|                  | <i>Heterocapsa triquetra</i> K-0482   | Kattegat, Denmark (1988)      | L1      | 16:8  | 150       | 15     | Berge et al. (2012)    |
|                  | <i>Heterocapsa triquetra</i> K-1133   | Baltic (2007)                 | f/2     | 14:10 | 150       | 15     | Berge et al. (2010)    |
|                  | <i>Heterocapsa triquetra</i> KAC 26   | Kalmarsund, Sweden (2000)     | L1      | 16:8  | 150       | 15     | Berge et al. (2012)    |
|                  | <i>Heterocapsa triquetra</i> KAC 27   | Kalmarsund, Sweden (2000)     | L1      | 16:8  | 150       | 15     | Berge et al. (2012)    |
|                  | <i>Heterocapsa triquetra</i> KAC 49   | West Coast, Sweden (1986)     | L1      | 16:8  | 150       | 15     | Berge et al. (2012)    |
|                  | <i>Heterocapsa triquetra</i> NC 98    | West Coast, Norway (1998)     | L1      | 16:8  | 150       | 15     | Berge et al. (2012)    |
|                  | <i>Heterocapsa triquetra</i> NIES 235 | Osaka Bay, Japan (1982)       | L1      | 16:8  | 150       | 15     | Berge et al. (2012)    |
|                  | <i>Heterocapsa triquetra</i> NIES 7   | Farima-Nada, Japan (1981)     | L1      | 16:8  | 150       | 15     | Berge et al. (2012)    |
|                  | <i>Heterocapsa triquetra</i> PLY 169  | Tamar Estuary, England (1957) | L1      | 16:8  | 150       | 15     | Berge et al. (2012)    |
|                  | <i>Karlodinium veneficum</i> K-1413   | North Sea (2007)              | f/2     | 14:10 | 150       | 15     | Berge et al. (2010)    |
|                  | <i>Prorocentrum micans</i> K-0335     | Kattegat, Denmark (1989)      | mod. B1 | 16:8  | 65        | 15 ± 2 | Møgelhøj et al. (2006) |
|                  | <i>Prorocentrum micans</i> K-1137     | Skagerrak (2008)              | f/2     | 14:10 | 150       | 15     | Berge et al. (2010)    |

| Division (Class) | Species, Strain                    | Isolation Site (Year)    | Medium  | L:D   | $E_{\mu}$ | T      | Source                                    |
|------------------|------------------------------------|--------------------------|---------|-------|-----------|--------|-------------------------------------------|
| Dinoflagellata   | <i>Prorocentrum minimum</i> K-0295 | Kattegat, Denmark (1989) | f/2     | 16:8  | 60        | 15 ± 1 | Hansen (2002);<br>Hansen et al.<br>(2007) |
|                  | <i>Prorocentrum minimum</i> K-0295 | Kattegat, Denmark (1989) | mod. B1 | 16:8  | 65        | 15 ± 2 | Møgelhøj et al.<br>(2006)                 |
|                  | <i>Prorocentrum minimum</i> K-1138 | Skagerrak (2008)         | f/2     | 14:10 | 150       | 15     | Berge et al.<br>(2010)                    |

9

Berge, T., Daugbjerg, N., Balling Andersen, B., and Hansen, P.J.: Effect of lowered pH on marine phytoplankton growth rates, *Mar Ecol Prog Ser*, 416, 79–91, doi:10.3354/meps08780, 2010.

Berge, T., Daugbjerg, N., and Hansen, P. J.: Isolation and cultivation of microalgae select for low growth rate and tolerance to high pH, *Harmful Algae*, 20, 101–110, doi:10.1016/j.hal.2012.08.006, 2012.

Guillard, R. R. L.: Culture of phytoplankton for feeding marine invertebrates, in: *Culture of marine invertebrate animals*, edited by: Smith, W. L. and Chanley, M. H., Plenum, New York, 108–132, [https://doi.org/10.1007/978-1-4615-8714-9\\_3](https://doi.org/10.1007/978-1-4615-8714-9_3), 1975

Guillard, R. R. L. and Hargraves, P. E.: *Stichochrysis immobilis* is a diatom, not a chrysophyte., *Phycologia*, 32, 234-236, 1993.

Hansen, P. J.: The red tide dinoflagellate *Alexandrium tamarense*: effects on behaviour and growth of a tintinnid ciliate, *Marine Ecology Progress Series*, 53, 105-116, 1989.

Hansen, P. J.: Effect of high pH on the growth and survival of marine phytoplankton: Implications for species succession, *Aquat Microb Ecol*, 28, 179-288, doi:10.3354/ame028279, 2002.

Hansen, P. J., Lundholm, N., and Rost, B.: Growth limitation in marine red-tide dinoflagellates: Effects of pH versus inorganic carbon availability, *Mar Ecol Prog Ser*, 334, 63–71, doi:10.3354/meps334063, 2007.

Liu, W., Au, D. W. T., Anderson, D. M., Lam, P. K. S., and Wu, R. S. S.: Effects of nutrients, salinity, pH and light:dark cycle on the production of reactive oxygen species in the alga *Chattonella marina*, *J Exp Mar Biol Ecol*, 346, 76–86, doi:10.1016/j.jembe.2007.03.007, 2007.

Lundholm, N., Hansen, P. J., and Kotaki, Y.: Effect of pH on growth and domoic acid production by potentially toxic diatoms of the genera *Pseudo-nitzschia* and *Nitzschia*, *Mar Ecol Prog*, 273, 1-15, doi:10.3354/meps273001, 2004.

Møgelhøj, M., Hansen, P. J., Henriksen, P., and Lundholm, N.: High pH and not allelopathy may be responsible for negative effects of *Nodularia spumigena* on other algae, *Aquat Microb Ecol*, 43, 43–54, doi:10.3354/ame043043, 2006.

Nielsen, L. T., Lundholm, N., and Hansen, P. J.: Does irradiance influence the tolerance of marine phytoplankton to high pH? *Mar Bio Res*, 3(6), 446-453, doi:10.1080/17451000701711820, 2007.

Schmidt, L. E. and Hansen, P. J.: Allelopathy in the prymnesiophyte *Chrysochromulina polylepis*: effect of cell concentration, growth phase and pH  
doi:10.3354/meps216067, Mar Ecol Prog Ser, 216, 67–81, 2001.

Søderberg, L., and Hansen, P.: Growth limitation due to high pH and low inorganic carbon concentrations in temperate species of the dinoflagellate genus *Ceratium*,  
Mar Ecol Prog Ser, 351, 103–112, doi:10.3354/meps07146, 2007.

↳ Søgaard, D.H., Hansen, P.J., Rysgaard, S., and Glud, R.N.: Growth limitation of three Arctic sea ice algal species: Effects of salinity, pH, and inorganic carbon  
availability, Polar Biol, 34(8), 1157–1165, doi:10.1007/s00300-011-0976-3, 2011.

Weisse, T., and Stadler, P.: Effect of pH on growth, cell volume, and production of freshwater ciliates, and implications for their distribution, Limnol Oceanogr,  
51, 1708–1715, doi:10.4319/lo.2006.51.4.1708, 2006.



## Supplementary 2

### Comparison of Aerated and pH-drift Cultures of *Thalassiosira pseudonana* CCMP1335

In both cultures, there was a rapid increase in particles with chlorophyll a autofluorescence in the first 48 hours of the experiment (Figure S1 a, b).

- 5 Thereafter, the concentration of particles decreased but their size, as inferred from the median side-scatter, increased (Figure S1 a, b). Both the initial peak in concentration and the subsequent rise in side scatter were more pronounced in the aerated culture. The most parsimonious explanation for this is that the cells aggregated in stationary phase. A biomass proxy (Figure S1 a, b) was calculated as the product of the two terms. This demonstrated the expected biomass response of exponential growth followed by stability in early stationary phase.
- 10 The changes in the biomass proxy were coincident with a draw-down in CO<sub>2</sub> and bicarbonate and a rise in carbonate (Figure S1 c, d). The drawdown was persistent in the pH-drift (sealed) culture but was reversed in the aerated culture after active biomass accumulation ceased. The lower pH in the latter favoured bicarbonate over carbonate, while carbonate dominated in the sealed culture.

There was a decline in photosynthetic efficiency ( $F_v/F_m$ ) in both cultures, which was more pronounced in the pH-drift culture (Figure S1 e, f). In

- 15 contrast, there was relatively little variation in the photosynthetic cross-section ( $\sigma$ ) in either.

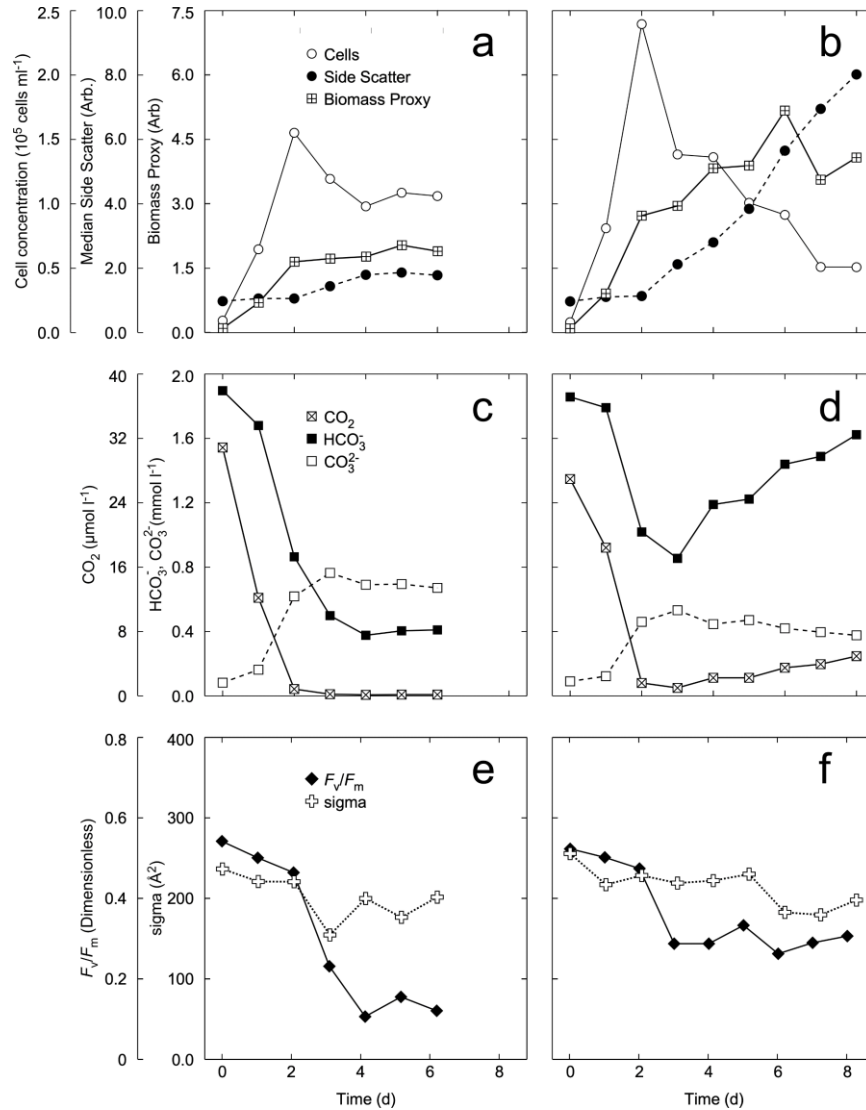

Figure S1: Time courses of biomass parameters (a, b), concentrations of carbon species (c, d), and photosynthetic response variables (e, f) in sealed (a, c, e) and aerated (b, d, f) cultures of *Thalassiosira pseudonana*. Concentrations of carbon species were calculated from pH and DIC (see Methods for details).
